# Supplementary material for: A modular analysis of microglia gene expression, insights into the aged phenotype
Source: PubMed Central journal article supplement (PMC6396472; doi:10.1186/s12864-019-5549-9), 2019-02-28

**Fig. S1**

**MACS Cd11b+**

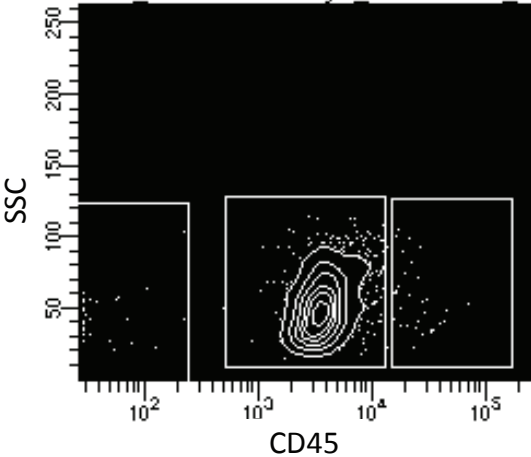

**No MACS**

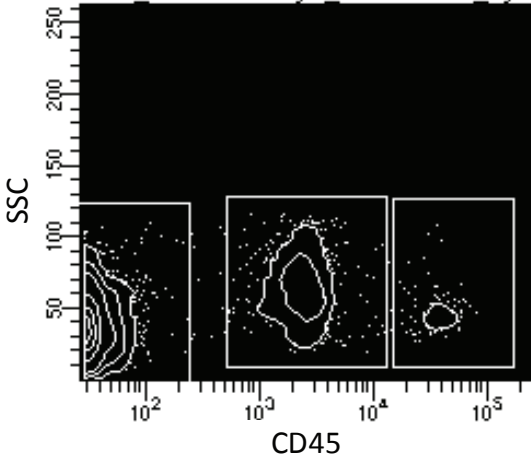

Supplement: 12864_2019_5549_MOESM5_ESM.pdf [file 12864_2019_5549_MOESM5_ESM.pdf]
