# Supplementary material for: A modular analysis of microglia gene expression, insights into the aged phenotype
Source: PubMed Central journal article supplement (PMC6396472; doi:10.1186/s12864-019-5549-9), 2019-02-28
Supplement: 12864_2019_5549_MOESM6_ESM.pdf [file 12864_2019_5549_MOESM6_ESM.pdf]

**Fig. S2**

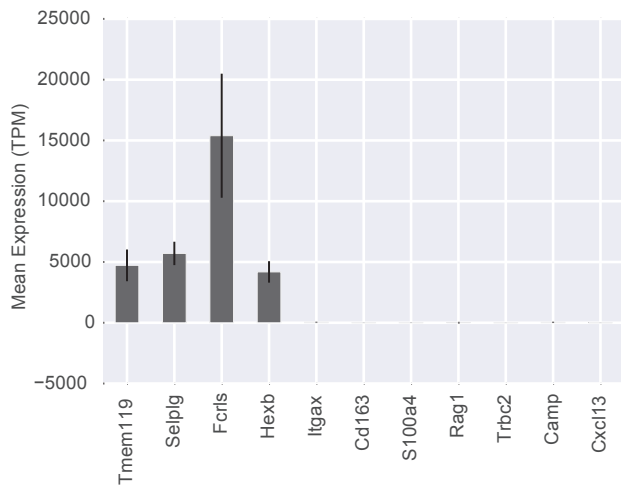

| Gene    | Cell Type                |
|---------|--------------------------|
| Tmem119 | Microglia                |
| Selplg  | Microglia                |
| Fcrls   | Microglia                |
| Hexb    | Microglia                |
| Itgax   | Dendritic cells          |
| Cd163   | Perivascular macrophages |
| S100a4  | Monocytes and T cells    |
| Rag1    | B cells                  |
| Trbc2   | T cells                  |
| Camp    | Granulocytes             |
| Cxcl13  | Peripheral macrophages   |
